# Supplementary material for: Engineered cytokine/antibody fusion proteins improve IL-2 delivery to pro-inflammatory cells and promote antitumor activity
Source: JCI journal article supplement (doi:10.1172/jci.insight.173469), 2024-08-08
Supplement: sd2 [file 2]

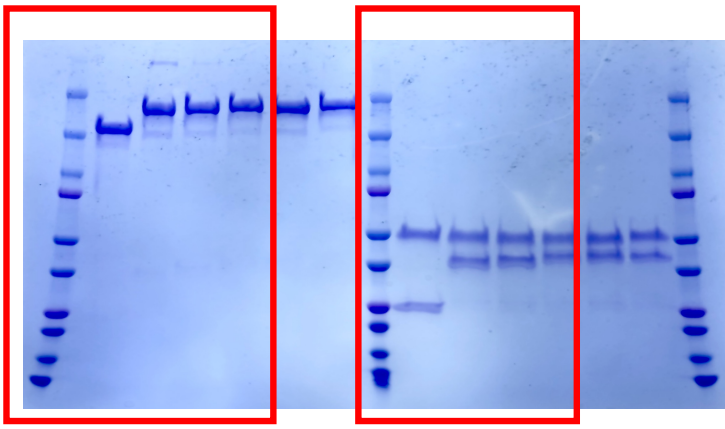

Figure 1B.

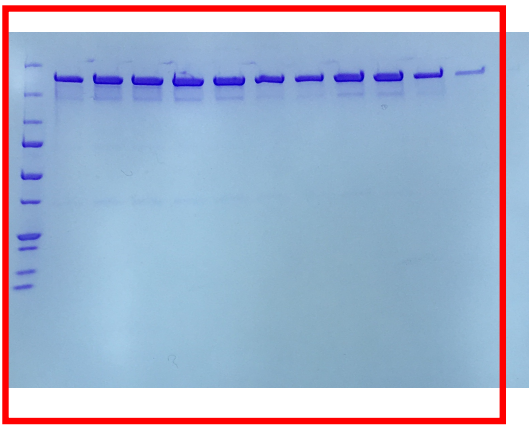

**Supplemental Figure 1D.**

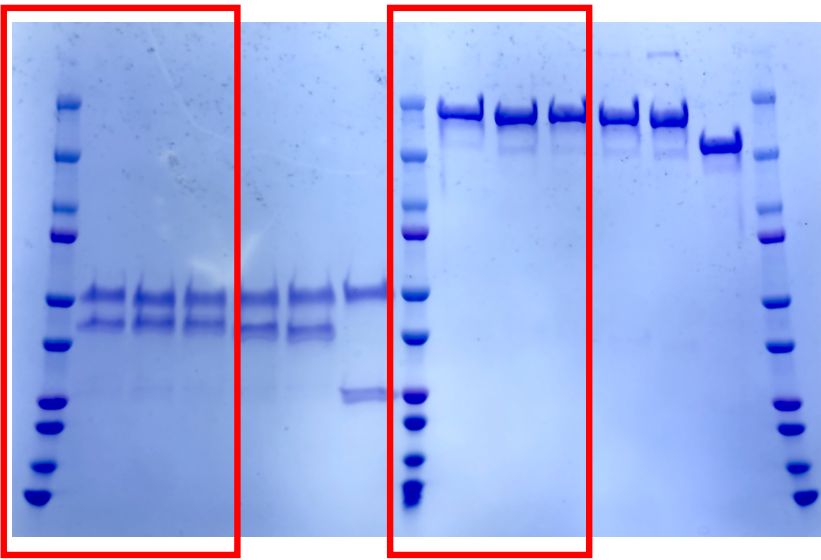

Supplemental Figure 3K.
